# Supplementary material for: Changes in Plasma Metabolome Profiles Following Oral Glucose Challenge among Adult Chinese
Source: MDPI journal article supplement (doi:10.3390/nu13051474), 2021-04-27
Supplement: s1 [file nutrients-1157076-supplementary.pdf › nutrients-1157076-supplementary.pdf]

**Supplementary Table 1.** Metabolites significantly changed at 2-h of OGTT.

| Metabolite                            | Total |                        |      | Normal glucose |                        |      | Prediabetes |                        |      | T2D  |       |      |
|---------------------------------------|-------|------------------------|------|----------------|------------------------|------|-------------|------------------------|------|------|-------|------|
|                                       | FC    | FDR                    | VIP  | FC             | FDR                    | VIP  | FC          | FDR                    | VIP  | FC   | FDR   | VIP  |
| Tauropine                             | 1.79  | 3.78×10 <sup>-18</sup> | 1.96 | 1.65           | 4.13×10 <sup>-04</sup> | 1.39 | 1.94        | 3.27×10 <sup>-14</sup> | 2.26 | 1.67 | 0.069 | 1.76 |
| 5'-methylthioadenosine                | 1.68  | 1.39×10 <sup>-29</sup> | 2.43 | 1.86           | 3.13×10 <sup>-17</sup> | 2.99 | 1.55        | 4.69×10 <sup>-11</sup> | 1.92 | 1.66 | 0.031 | 2.14 |
| D-mannose 1-phosphate                 | 1.40  | 1.82×10 <sup>-24</sup> | 2.43 | 1.34           | 1.53×10 <sup>-06</sup> | 1.76 | 1.44        | 1.51×10 <sup>-15</sup> | 2.62 | 1.47 | 0.005 | 2.77 |
| Norbelladine                          | 1.36  | 2.37×10 <sup>-14</sup> | 1.56 | 1.33           | 2.84×10 <sup>-05</sup> | 1.34 | 1.40        | 6.60×10 <sup>-08</sup> | 1.56 | 1.31 | 0.093 | 1.62 |
| Se-adenosyl-L-selenohomocysteine      | 1.34  | 2.60×10 <sup>-26</sup> | 2.49 | 1.41           | 6.70×10 <sup>-14</sup> | 2.57 | 1.30        | 1.12×10 <sup>-11</sup> | 2.27 | 1.22 | 0.097 | 1.77 |
| Cocaine                               | 1.32  | 3.45×10 <sup>-16</sup> | 1.72 | 1.36           | 2.89×10 <sup>-09</sup> | 1.79 | 1.32        | 1.63×10 <sup>-06</sup> | 1.56 | 1.24 | 0.094 | 1.29 |
| CDP-choline                           | 1.31  | 1.31×10 <sup>-36</sup> | 2.89 | 1.35           | 3.56×10 <sup>-19</sup> | 2.93 | 1.30        | 5.24×10 <sup>-18</sup> | 2.8  | 1.22 | 0.138 | 1.62 |
| 5-acetamidopentanoate                 | 1.30  | 8.24×10 <sup>-17</sup> | 1.16 | 1.30           | 6.49×10 <sup>-07</sup> | 0.97 | 1.29        | 7.95×10 <sup>-08</sup> | 1.12 | 1.31 | 0.03  | 1.49 |
| Nicotinamide D-ribonucleotide         | 1.26  | 1.62×10 <sup>-09</sup> | 1.20 | 1.37           | 4.67×10 <sup>-07</sup> | 1.48 | 1.23        | 5.13×10 <sup>-05</sup> | 1.18 | 1.02 | 0.895 | 0.18 |
| Glutaral                              | 1.25  | 2.63×10 <sup>-17</sup> | 1.16 | 1.28           | 2.88×10 <sup>-09</sup> | 1.24 | 1.22        | 6.95×10 <sup>-07</sup> | 0.96 | 1.30 | 0.067 | 1.24 |
| Se-methylselenomethionine             | 1.24  | 1.60×10 <sup>-19</sup> | 1.93 | 1.23           | 1.94×10 <sup>-08</sup> | 1.74 | 1.25        | 1.35×10 <sup>-10</sup> | 1.96 | 1.26 | 0.168 | 1.50 |
| Beta-alanyl-L-arginine                | 1.24  | 5.53×10 <sup>-26</sup> | 2.18 | 1.28           | 1.68×10 <sup>-13</sup> | 2.17 | 1.24        | 5.67×10 <sup>-13</sup> | 2.10 | 1.16 | 0.183 | 1.40 |
| Coumaryl acetate                      | 1.24  | 2.24×10 <sup>-21</sup> | 2.25 | 1.30           | 4.14×10 <sup>-12</sup> | 2.50 | 1.22        | 1.01×10 <sup>-09</sup> | 1.93 | 1.11 | 0.206 | 1.43 |
| Gamma-glutamyl-beta-cyanoalanine      | 1.24  | 2.71×10 <sup>-19</sup> | 2.11 | 1.17           | 4.04×10 <sup>-04</sup> | 1.38 | 1.29        | 9.91×10 <sup>-14</sup> | 2.45 | 1.25 | 0.035 | 2.12 |
| 3-amino-L-alanine                     | 1.23  | 1.47×10 <sup>-11</sup> | 1.65 | 1.28           | 2.44×10 <sup>-05</sup> | 1.63 | 1.21        | 5.07×10 <sup>-06</sup> | 1.55 | 1.14 | 0.282 | 1.30 |
| 3-phospho-D-glycerate                 | 1.22  | 6.74×10 <sup>-16</sup> | 1.87 | 1.19           | 2.67×10 <sup>-05</sup> | 1.54 | 1.25        | 3.43×10 <sup>-09</sup> | 2.01 | 1.19 | 0.064 | 1.60 |
| Riboflavin                            | 1.22  | 1.35×10 <sup>-14</sup> | 1.56 | 1.20           | 7.83×10 <sup>-06</sup> | 1.31 | 1.23        | 7.95×10 <sup>-08</sup> | 1.67 | 1.21 | 0.112 | 1.20 |
| (R,S)-nicotine                        | 1.21  | 5.41×10 <sup>-05</sup> | 0.88 | 1.15           | 0.215                  | 0.50 | 1.24        | 5.80×10 <sup>-04</sup> | 1.00 | 1.32 | 0.238 | 1.34 |
| Pseudouridine                         | 1.21  | 8.59×10 <sup>-52</sup> | 2.85 | 1.19           | 4.15×10 <sup>-18</sup> | 2.46 | 1.22        | 3.99×10 <sup>-30</sup> | 3.01 | 1.22 | 0.002 | 2.36 |
| N-amidino-L-aspartate                 | 1.21  | 2.29×10 <sup>-19</sup> | 2.06 | 1.24           | 3.09×10 <sup>-09</sup> | 2.04 | 1.21        | 3.09×10 <sup>-12</sup> | 2.15 | 1.08 | 0.602 | 0.73 |
| N6-hydroxy-L-lysine                   | 1.21  | 1.77×10 <sup>-12</sup> | 1.66 | 1.21           | 5.14×10 <sup>-04</sup> | 1.32 | 1.25        | 6.88×10 <sup>-11</sup> | 2.10 | 1.05 | 0.951 | 0.08 |
| 5,10-methylenetetrahydromethanopterin | 1.20  | 8.80×10 <sup>-05</sup> | 0.89 | 1.28           | 4.49×10 <sup>-05</sup> | 1.51 | 1.16        | 0.053                  | 0.73 | 1.11 | 0.827 | 0.27 |
| (24R,24(1)R)-fucosterol epoxide       | 1.20  | 3.96×10 <sup>-08</sup> | 1.29 | 1.18           | 0.026                  | 0.85 | 1.23        | 4.05×10 <sup>-06</sup> | 1.56 | 1.15 | 0.238 | 1.26 |

|                                           |      |                        |      |      |                        |      |      |                        |      |      |       |      |
|-------------------------------------------|------|------------------------|------|------|------------------------|------|------|------------------------|------|------|-------|------|
| Carnosine                                 | 1.20 | 4.74×10 <sup>-06</sup> | 1.02 | 1.18 | 0.004                  | 0.97 | 1.23 | 0.001                  | 1.02 | 1.13 | 0.62  | 0.63 |
| 5-ureido-4-imidazole carboxylate          | 1.19 | 1.93×10 <sup>-07</sup> | 0.80 | 1.23 | 0.002                  | 0.81 | 1.14 | 0.01                   | 0.59 | 1.25 | 0.013 | 1.37 |
| 2-pyrone-4,6-dicarboxylate                | 1.18 | 1.21×10 <sup>-11</sup> | 1.59 | 1.23 | 2.14×10 <sup>-06</sup> | 1.63 | 1.16 | 8.08×10 <sup>-06</sup> | 1.54 | 1.08 | 0.587 | 0.75 |
| L-2-methyltryptophan                      | 1.17 | 4.28×10 <sup>-15</sup> | 1.45 | 1.21 | 1.31×10 <sup>-09</sup> | 1.66 | 1.15 | 7.80×10 <sup>-06</sup> | 1.23 | 1.11 | 0.191 | 1.06 |
| APMF-Glu                                  | 1.16 | 1.84×10 <sup>-17</sup> | 1.96 | 1.17 | 2.01×10 <sup>-08</sup> | 1.91 | 1.15 | 8.99×10 <sup>-07</sup> | 1.63 | 1.23 | 0.004 | 2.87 |
| 4-hydroxy-2-oxohexanoic acid              | 1.16 | 1.08×10 <sup>-09</sup> | 1.40 | 1.17 | 3.43×10 <sup>-05</sup> | 1.47 | 1.13 | 0.002                  | 1.00 | 1.24 | 0.02  | 2.28 |
| Taxifolin                                 | 1.13 | 1.48×10 <sup>-05</sup> | 1.01 | 1.09 | 0.08                   | 0.69 | 1.14 | 0.004                  | 0.96 | 1.26 | 0.036 | 1.88 |
| Hypotaurine                               | 1.13 | 5.34×10 <sup>-06</sup> | 1.19 | 1.11 | 0.032                  | 0.89 | 1.13 | 0.006                  | 1.06 | 1.25 | 0.036 | 2.22 |
| Cytidine                                  | 1.13 | 5.23×10 <sup>-05</sup> | 0.76 | 1.05 | 0.358                  | 0.27 | 1.21 | 3.39×10 <sup>-05</sup> | 1.12 | 1.08 | 0.528 | 0.68 |
| Dhurrin                                   | 1.12 | 4.11×10 <sup>-04</sup> | 0.88 | 1.12 | 0.219                  | 0.56 | 1.11 | 0.02                   | 0.87 | 1.21 | 0.044 | 1.73 |
| 4-imidazolone-5-acetate                   | 1.09 | 1.31×10 <sup>-04</sup> | 0.93 | 1.06 | 0.141                  | 0.58 | 1.09 | 0.027                  | 0.82 | 1.27 | 0.034 | 2.18 |
| 4-methylene-L-glutamine                   | 1.02 | 0.57                   | 0.16 | 0.98 | 0.638                  | 0.19 | 1.00 | 0.843                  | 0.09 | 1.31 | 0.036 | 2.08 |
| Lipoyl-AMP                                | 0.84 | 9.56×10 <sup>-14</sup> | 1.56 | 0.88 | 1.87×10 <sup>-04</sup> | 1.29 | 0.83 | 1.85×10 <sup>-07</sup> | 1.46 | 0.75 | 0.03  | 2.30 |
| Thiamin triphosphate                      | 0.83 | 1.04×10 <sup>-14</sup> | 1.81 | 0.83 | 1.20×10 <sup>-05</sup> | 1.59 | 0.86 | 7.24×10 <sup>-06</sup> | 1.54 | 0.77 | 0.004 | 2.77 |
| L-citrulline                              | 0.83 | 5.73×10 <sup>-18</sup> | 1.69 | 0.86 | 2.92×10 <sup>-06</sup> | 1.40 | 0.83 | 7.84×10 <sup>-10</sup> | 1.68 | 0.78 | 0.025 | 1.94 |
| beta-citryl-L-glutamate                   | 0.83 | 4.09×10 <sup>-14</sup> | 1.54 | 0.83 | 1.14×10 <sup>-06</sup> | 1.47 | 0.84 | 1.39×10 <sup>-05</sup> | 1.32 | 0.79 | 0.014 | 1.99 |
| L-2-aminoadipate                          | 0.83 | 2.87×10 <sup>-19</sup> | 1.87 | 0.86 | 5.68×10 <sup>-05</sup> | 1.37 | 0.80 | 7.73×10 <sup>-14</sup> | 2.15 | 0.83 | 0.109 | 1.55 |
| Tetradecanoic acid                        | 0.83 | 1.55×10 <sup>-30</sup> | 2.19 | 0.83 | 3.48×10 <sup>-11</sup> | 1.87 | 0.83 | 1.29×10 <sup>-16</sup> | 2.19 | 0.79 | 0.009 | 2.32 |
| Sinapoyl-CoA                              | 0.82 | 7.95×10 <sup>-09</sup> | 1.09 | 0.79 | 3.48×10 <sup>-06</sup> | 1.26 | 0.84 | 6.03×10 <sup>-05</sup> | 1.06 | 0.88 | 0.778 | 0.44 |
| 3-ketolactose                             | 0.82 | 6.91×10 <sup>-10</sup> | 1.35 | 0.80 | 1.07×10 <sup>-05</sup> | 1.55 | 0.81 | 9.02×10 <sup>-04</sup> | 1.06 | 0.88 | 0.229 | 1.22 |
| Hypoxanthine                              | 0.81 | 4.72×10 <sup>-07</sup> | 1.01 | 0.79 | 3.78×10 <sup>-04</sup> | 1.12 | 0.85 | 0.016                  | 0.76 | 0.76 | 0.069 | 1.25 |
| L-tryptophanamide                         | 0.81 | 1.86×10 <sup>-09</sup> | 1.26 | 0.78 | 1.21×10 <sup>-05</sup> | 1.52 | 0.82 | 8.87×10 <sup>-05</sup> | 1.16 | 0.92 | 0.866 | 0.25 |
| D-glycerate                               | 0.81 | 6.19×10 <sup>-10</sup> | 1.21 | 0.76 | 2.73×10 <sup>-08</sup> | 1.81 | 0.82 | 7.29×10 <sup>-04</sup> | 0.90 | 0.96 | 0.881 | 0.21 |
| Galacturonic acid                         | 0.81 | 4.55×10 <sup>-20</sup> | 1.53 | 0.80 | 9.65×10 <sup>-08</sup> | 1.34 | 0.80 | 6.71×10 <sup>-13</sup> | 1.86 | 0.89 | 0.459 | 0.53 |
| alpha-D-galactosyl-(1->3)-1D-myo-inositol | 0.80 | 1.34×10 <sup>-07</sup> | 1.29 | 0.74 | 7.65×10 <sup>-07</sup> | 1.83 | 0.85 | 0.054                  | 0.70 | 0.86 | 0.349 | 1.20 |
| 2-(acetamidomethylene)succinate           | 0.80 | 2.45×10 <sup>-24</sup> | 2.38 | 0.81 | 7.71×10 <sup>-08</sup> | 2.01 | 0.81 | 5.99×10 <sup>-13</sup> | 2.35 | 0.78 | 0.002 | 2.63 |

|                                                                     |      |                        |      |      |                        |      |      |                        |      |      |       |      |
|---------------------------------------------------------------------|------|------------------------|------|------|------------------------|------|------|------------------------|------|------|-------|------|
| L-palmitoylcarnitine                                                | 0.80 | $9.13 \times 10^{-30}$ | 2.17 | 0.79 | $2.29 \times 10^{-16}$ | 2.33 | 0.81 | $1.99 \times 10^{-12}$ | 1.90 | 0.85 | 0.067 | 1.67 |
| Biotin sulfoxide                                                    | 0.80 | $8.65 \times 10^{-15}$ | 1.53 | 0.78 | $1.80 \times 10^{-08}$ | 1.64 | 0.79 | $3.78 \times 10^{-07}$ | 1.46 | 0.93 | 0.71  | 0.53 |
| D-lysopine                                                          | 0.80 | $2.19 \times 10^{-08}$ | 1.36 | 0.81 | 0.002                  | 1.15 | 0.80 | $2.15 \times 10^{-04}$ | 1.32 | 0.79 | 0.087 | 1.69 |
| sn-glycero-3-phosphocholine                                         | 0.80 | $4.87 \times 10^{-12}$ | 1.51 | 0.75 | $6.54 \times 10^{-08}$ | 1.77 | 0.81 | $9.63 \times 10^{-08}$ | 1.65 | 0.95 | 0.947 | 0.10 |
| Hexadecanoic acid                                                   | 0.79 | $8.50 \times 10^{-25}$ | 2.26 | 0.78 | $1.03 \times 10^{-14}$ | 2.40 | 0.80 | $4.29 \times 10^{-11}$ | 2.05 | 0.81 | 0.099 | 1.72 |
| Xanthosine                                                          | 0.79 | $3.78 \times 10^{-46}$ | 2.88 | 0.78 | $5.45 \times 10^{-18}$ | 2.59 | 0.79 | $2.76 \times 10^{-24}$ | 2.95 | 0.82 | 0.004 | 2.22 |
| sn-glycerol 3-phosphate                                             | 0.79 | $2.89 \times 10^{-31}$ | 2.41 | 0.78 | $1.03 \times 10^{-14}$ | 2.38 | 0.78 | $2.05 \times 10^{-19}$ | 2.61 | 0.87 | 0.584 | 0.67 |
| Lithocholic acid                                                    | 0.79 | $2.43 \times 10^{-18}$ | 1.66 | 0.82 | $2.63 \times 10^{-06}$ | 1.40 | 0.77 | $2.79 \times 10^{-10}$ | 1.77 | 0.76 | 0.044 | 1.37 |
| Tyramine                                                            | 0.78 | $1.01 \times 10^{-06}$ | 1.21 | 0.71 | $1.97 \times 10^{-05}$ | 1.55 | 0.87 | 0.199                  | 0.56 | 0.72 | 0.02  | 2.07 |
| 1-O-[2-(acetylamino)-2-deoxy-alpha-D-glucopyranosyl]-D-myo-inositol | 0.78 | $5.79 \times 10^{-12}$ | 1.68 | 0.76 | $8.11 \times 10^{-07}$ | 1.73 | 0.78 | $2.10 \times 10^{-05}$ | 1.52 | 0.82 | 0.288 | 1.28 |
| 4-glutathionyl cyclophosphamide                                     | 0.77 | $9.82 \times 10^{-11}$ | 1.37 | 0.77 | $5.28 \times 10^{-05}$ | 1.27 | 0.77 | $4.02 \times 10^{-05}$ | 1.26 | 0.75 | 0.112 | 1.53 |
| L-octanoylcarnitine                                                 | 0.77 | $1.44 \times 10^{-18}$ | 1.86 | 0.74 | $6.50 \times 10^{-10}$ | 1.95 | 0.78 | $3.72 \times 10^{-07}$ | 1.61 | 0.82 | 0.044 | 1.53 |
| Sedoheptulose 7-phosphate                                           | 0.76 | $1.19 \times 10^{-21}$ | 2.23 | 0.76 | $2.89 \times 10^{-09}$ | 2.08 | 0.78 | $6.08 \times 10^{-09}$ | 1.94 | 0.72 | 0.002 | 3.00 |
| 2-(alpha-hydroxyethyl)thiamine diphosphate                          | 0.75 | $4.90 \times 10^{-24}$ | 2.41 | 0.75 | $1.02 \times 10^{-09}$ | 2.19 | 0.74 | $3.67 \times 10^{-13}$ | 2.43 | 0.79 | 0.079 | 1.87 |
| Choline phosphate                                                   | 0.75 | $5.30 \times 10^{-37}$ | 2.49 | 0.75 | $5.18 \times 10^{-15}$ | 2.26 | 0.73 | $1.14 \times 10^{-24}$ | 2.75 | 0.81 | 0.233 | 1.28 |
| 5-hydroxy-L-tryptophan                                              | 0.74 | $6.77 \times 10^{-20}$ | 1.88 | 0.71 | $2.88 \times 10^{-09}$ | 1.88 | 0.77 | $1.59 \times 10^{-08}$ | 1.67 | 0.74 | 0.03  | 1.81 |
| (9Z)-hexadecenoic acid                                              | 0.74 | $5.65 \times 10^{-49}$ | 2.93 | 0.73 | $2.14 \times 10^{-22}$ | 2.90 | 0.75 | $7.18 \times 10^{-23}$ | 2.66 | 0.75 | 0.004 | 2.72 |
| S-succinylglutathione                                               | 0.74 | $1.34 \times 10^{-31}$ | 2.59 | 0.70 | $7.13 \times 10^{-19}$ | 2.82 | 0.76 | $1.87 \times 10^{-13}$ | 2.36 | 0.83 | 0.174 | 1.45 |
| 1-(5'-phosphoribosyl)-5-amino-4-imidazolecarboxamide                | 0.73 | $2.08 \times 10^{-36}$ | 2.84 | 0.74 | $1.03 \times 10^{-14}$ | 2.61 | 0.71 | $1.56 \times 10^{-20}$ | 2.87 | 0.81 | 0.067 | 2.02 |
| Erucic acid                                                         | 0.73 | $3.55 \times 10^{-24}$ | 1.73 | 0.72 | $2.89 \times 10^{-09}$ | 1.74 | 0.73 | $5.68 \times 10^{-14}$ | 1.60 | 0.77 | 0.036 | 1.35 |
| Digalacturonate                                                     | 0.73 | $4.96 \times 10^{-27}$ | 2.59 | 0.72 | $3.58 \times 10^{-12}$ | 2.51 | 0.73 | $2.04 \times 10^{-12}$ | 2.38 | 0.74 | 0.02  | 2.43 |
| N4-(acetyl-beta-D-glucosaminy)asparagine                            | 0.73 | $1.13 \times 10^{-25}$ | 2.24 | 0.70 | $2.14 \times 10^{-12}$ | 2.30 | 0.72 | $1.16 \times 10^{-14}$ | 2.24 | 0.89 | 0.584 | 0.74 |
| Sakuranetin                                                         | 0.73 | $1.22 \times 10^{-20}$ | 1.99 | 0.69 | $6.44 \times 10^{-10}$ | 2.09 | 0.74 | $1.04 \times 10^{-10}$ | 1.91 | 0.86 | 0.371 | 0.92 |
| 4-hydroxy-2-quinolinecarboxylic acid                                | 0.72 | $1.65 \times 10^{-53}$ | 2.92 | 0.74 | $5.09 \times 10^{-20}$ | 2.69 | 0.71 | $4.32 \times 10^{-29}$ | 3.06 | 0.74 | 0.004 | 1.99 |

|                                  |      |                        |      |      |                        |      |      |                        |      |      |                        |      |
|----------------------------------|------|------------------------|------|------|------------------------|------|------|------------------------|------|------|------------------------|------|
| N-acetyl-L-2-amino-6-oxopimelate | 0.71 | $1.43 \times 10^{-26}$ | 2.60 | 0.73 | $9.29 \times 10^{-09}$ | 2.16 | 0.68 | $2.50 \times 10^{-17}$ | 2.83 | 0.79 | 0.107                  | 1.74 |
| L-mimosine                       | 0.65 | $2.28 \times 10^{-39}$ | 2.71 | 0.65 | $1.03 \times 10^{-14}$ | 2.42 | 0.63 | $2.09 \times 10^{-21}$ | 2.79 | 0.76 | 0.006                  | 1.90 |
| 16-hydroxypalmitate              | 0.65 | $3.65 \times 10^{-68}$ | 3.95 | 0.67 | $3.69 \times 10^{-25}$ | 3.60 | 0.62 | $1.08 \times 10^{-37}$ | 3.92 | 0.67 | $3.86 \times 10^{-04}$ | 3.47 |
| Glycocholate                     | 0.63 | $1.38 \times 10^{-73}$ | 3.43 | 0.65 | $5.81 \times 10^{-28}$ | 3.28 | 0.61 | $1.08 \times 10^{-37}$ | 3.28 | 0.68 | $1.32 \times 10^{-05}$ | 2.87 |
| L-glutamate                      | 0.56 | $1.62 \times 10^{-69}$ | 3.68 | 0.52 | $1.63 \times 10^{-31}$ | 3.86 | 0.56 | $6.16 \times 10^{-40}$ | 3.69 | 0.71 | 0.08                   | 1.54 |
| Sphingosine                      | 0.53 | $2.15 \times 10^{-59}$ | 3.56 | 0.49 | $5.16 \times 10^{-29}$ | 3.60 | 0.54 | $6.80 \times 10^{-27}$ | 3.32 | 0.63 | 0.005                  | 2.48 |
| AMP                              | 0.50 | $5.01 \times 10^{-41}$ | 3.22 | 0.48 | $1.74 \times 10^{-20}$ | 3.26 | 0.49 | $1.41 \times 10^{-20}$ | 3.15 | 0.62 | 0.152                  | 1.58 |

FC, fold change; FDR, false discovery rate; VIP, variable importance in projection. FC of metabolites is shown as the geometric mean of the ratio of the metabolites in each sample at 2-h and 0-h. FDR was calculated by a linear mixed effects model, and VIP was extracted from the PLS-DA results.

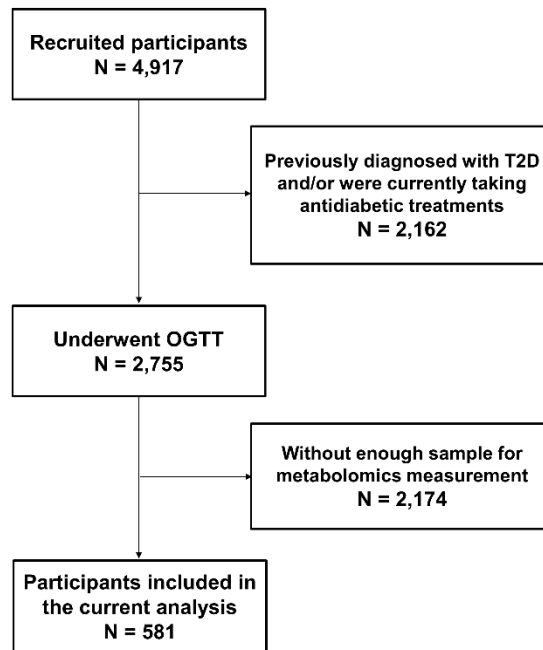

**Supplementary Figure 1.** Study flow diagram. We recruited 4,917 participants and 2,755 of them underwent OGTT. Finally, 581 participants with sufficient plasma sample were included in the current study.

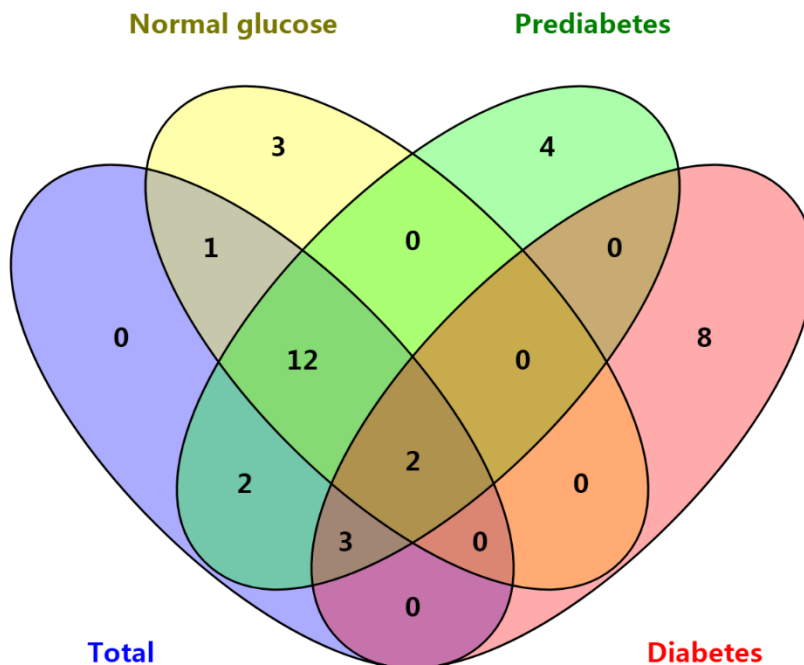

**Supplementary Figure 2.** Venn diagram of significantly increased metabolites in total, normal glucose, prediabetes, and T2D subjects.

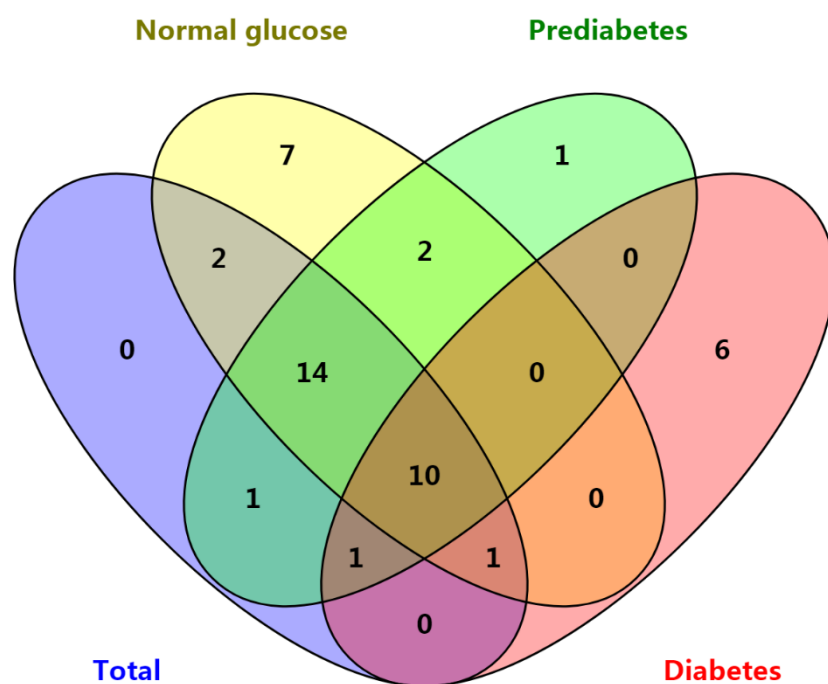

**Supplemental Figure 3.** Venn diagram of significantly decreased metabolites in total, normal glucose, prediabetes, and T2D subjects.
